# Supplementary material for: Iron doping boosts the reactivity and stability of the γ-Al2O3 nanosheet supported cobalt catalyst for propane dehydrogenation
Source: Royal Society of Chemistry journal article supplement (doi:10.1039/d0nj00381f), 2020-01-01
Supplement: d0nj00381f1.pdf [file d0nj00381f1.pdf]

## Electronic Supplementary Information

### **Iron doping boosts reactivity and stability of $\gamma$ -Al<sub>2</sub>O<sub>3</sub> nanosheet supported cobalt catalyst for propane dehydrogenation**

Chang-Wu Zhang, Jing Wen, Lei Wang, Xin-Ge Wang, and Lei Shi\*

*School of Chemical Engineering, Dalian University of Technology, Dalian 116024, PR China*

\*Corresponding authors.

*E-mail address:* [dlutshilei@dlut.edu.cn](mailto:dlutshilei@dlut.edu.cn) (L. Shi).

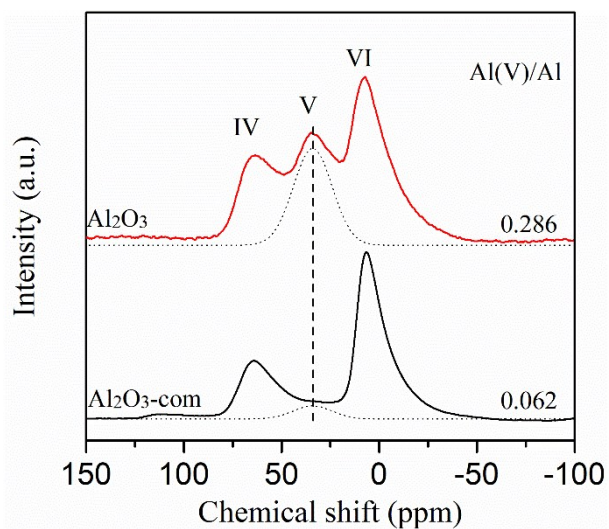

**Fig. S1**  $^{27}\text{Al}$  MAS NMR spectra and their deconvolution results of the  $5\text{Co}1.6\text{Fe}/\text{Al}_2\text{O}_3$  and  $5\text{Co}1.6\text{Fe}/\text{Al}_2\text{O}_3\text{-com}$  catalysts.

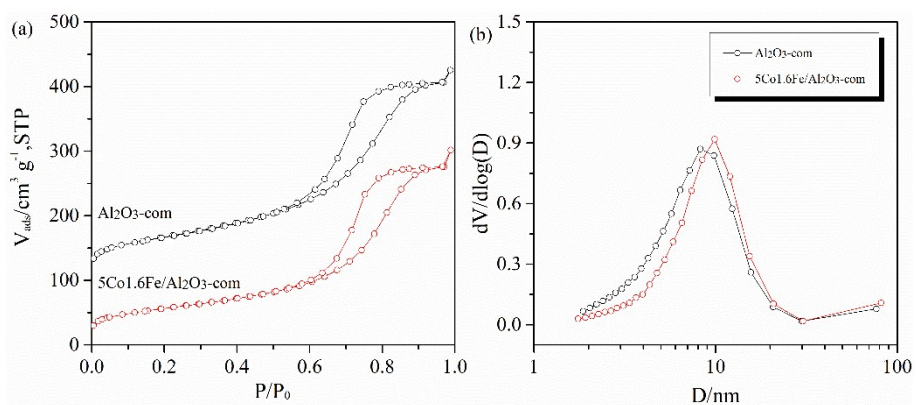

**Fig. S2** (a) Nitrogen sorption isotherms of the  $\text{Al}_2\text{O}_3\text{-com}$  and  $5\text{Co}1.6\text{Fe}/\text{Al}_2\text{O}_3\text{-com}$  catalysts. The isotherm of the  $\text{Al}_2\text{O}_3\text{-com}$  is offset vertically by  $100 \text{ cm}^3 \text{ g}^{-1}, \text{STP}$ . (b) The pore size distribution of the  $\text{Al}_2\text{O}_3\text{-com}$  and  $5\text{Co}1.6\text{Fe}/\text{Al}_2\text{O}_3\text{-com}$  catalysts.

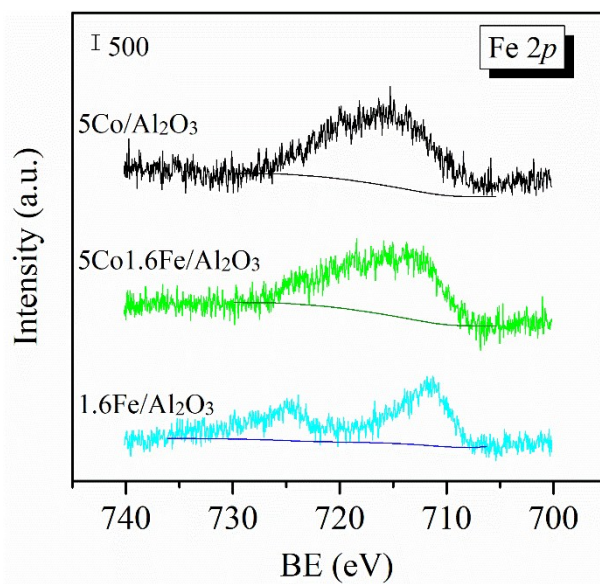

**Fig. S3** XPS spectra in the Fe 2p region of the 5Co/Al<sub>2</sub>O<sub>3</sub>, 5Co1.6Fe/Al<sub>2</sub>O<sub>3</sub> and 1.6Fe/Al<sub>2</sub>O<sub>3</sub> catalysts.

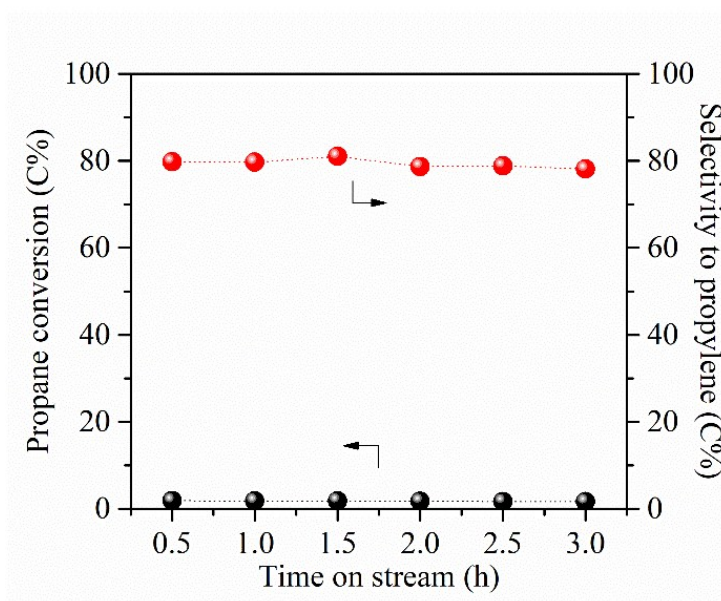

**Fig. S4** Propane conversion and propylene selectivity over the 5Fe/Al<sub>2</sub>O<sub>3</sub> catalyst as a function of reaction time. Reaction conditions: temperature, 590°C; catalyst weight, 0.1 g; gas feed, 16.2 kPa C<sub>3</sub>H<sub>8</sub>, and N<sub>2</sub> balance; flow rate, 25 mL min<sup>-1</sup>.

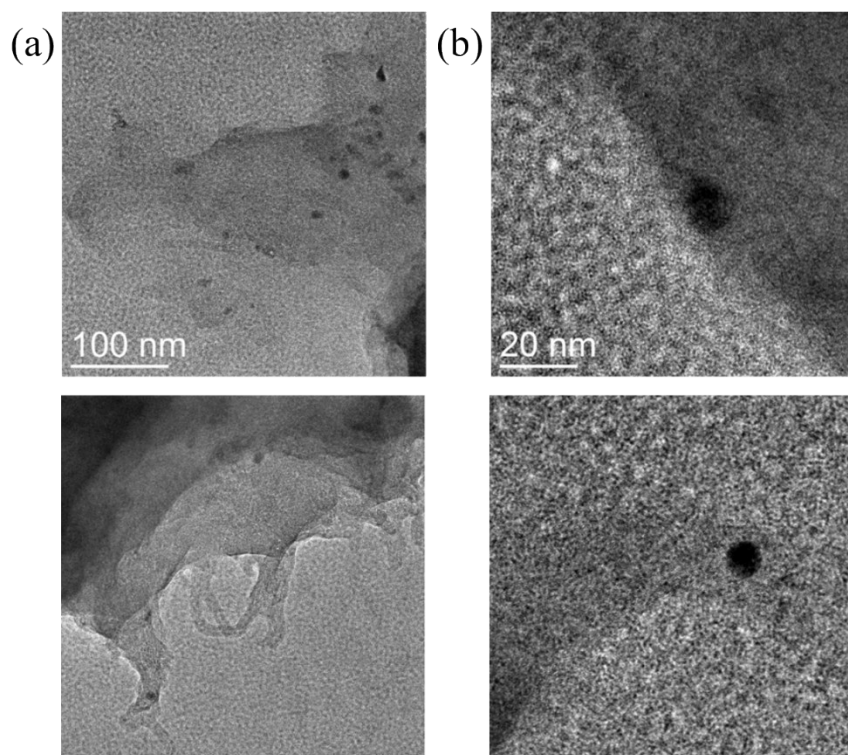

**Fig. S5** (a,b) HR-TEM images of the 5Co<sub>1.6</sub>Fe/Al<sub>2</sub>O<sub>3</sub> catalyst after 14-hour test in propane dehydrogenation reaction.

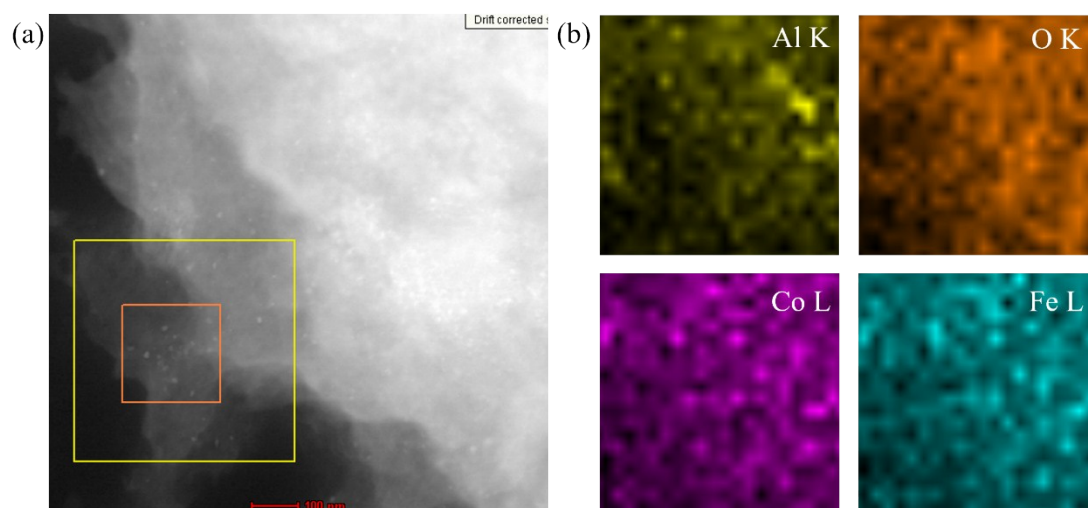

**Fig. S6** (a) HAADF-STEM image of the 5Co<sub>1.6</sub>Fe/Al<sub>2</sub>O<sub>3</sub> catalyst after 14-hour test in propane dehydrogenation, and (b) EDX elemental mapping analysis of Al-K, O-K, Co-L, and Fe-L edges.

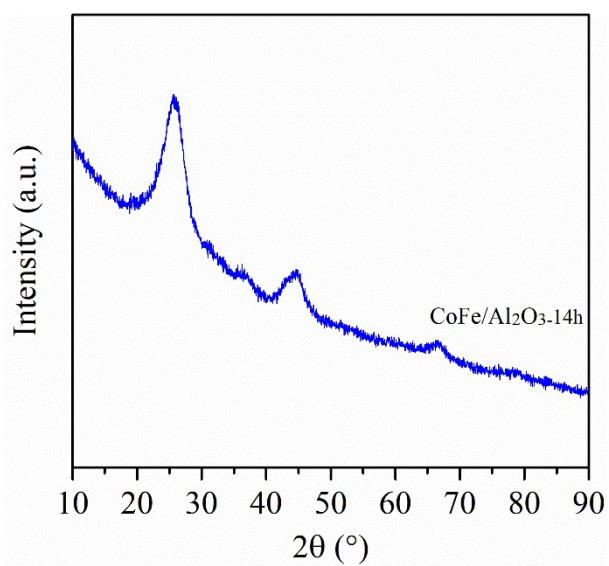

**Fig. S7** XRD patterns of series of cobalt-based catalysts after the propane dehydrogenation test.

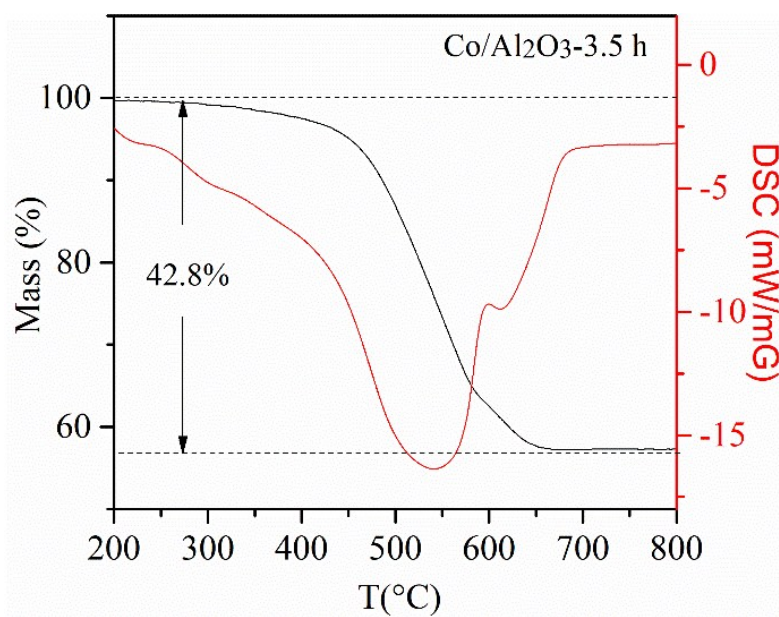

**Fig. S8** TGA and DSC curves of the 5Co/Al<sub>2</sub>O<sub>3</sub> catalyst after 3.5-hour test in propane dehydrogenation.

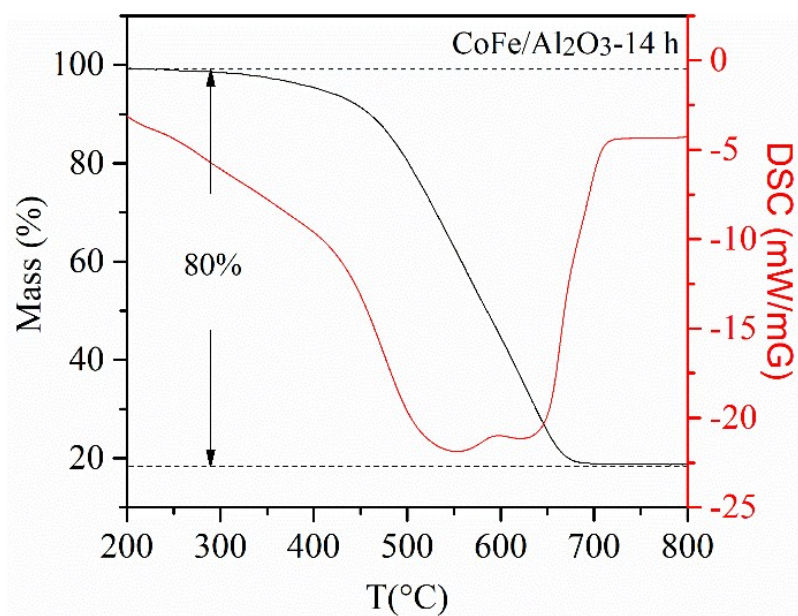

**Fig. S9** TGA and DSC curves of the 5Co1.6Fe/Al<sub>2</sub>O<sub>3</sub> catalyst after 14-hour test in propane dehydrogenation.

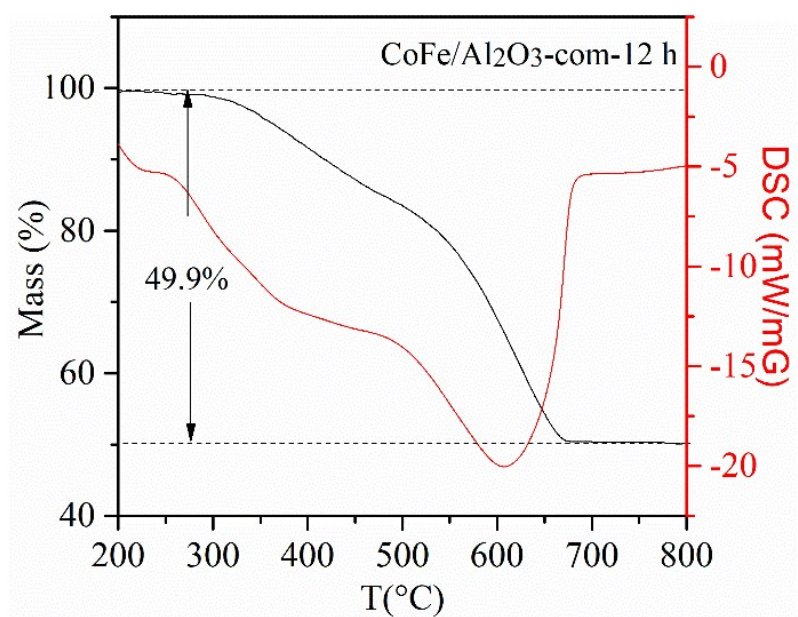

**Fig. S10** TGA and DSC curves of the 5Co1.6Fe/Al<sub>2</sub>O<sub>3</sub>-com catalyst after 12-hour test in propane dehydrogenation.

**Table S1.** The catalytic properties of  $\gamma$ -Al<sub>2</sub>O<sub>3</sub> nanosheet supported cobalt catalysts in propane dehydrogenation.<sup>a</sup>

| Catalysts                           | Conversion (%) | Selectivity (%)               |                               |                               |                 |
|-------------------------------------|----------------|-------------------------------|-------------------------------|-------------------------------|-----------------|
|                                     |                | C <sub>3</sub> H <sub>6</sub> | C <sub>2</sub> H <sub>6</sub> | C <sub>2</sub> H <sub>4</sub> | CH <sub>4</sub> |
| Al <sub>2</sub> O <sub>3</sub>      | 0.8            | 72.8                          | 18.1                          | 0.2                           | 8.9             |
| 1Co/Al <sub>2</sub> O <sub>3</sub>  | 5.7            | 93.6                          | 0.1                           | 3.9                           | 2.4             |
| 3Co/Al <sub>2</sub> O <sub>3</sub>  | 14.5           | 96.8                          | 0.1                           | 1.7                           | 1.4             |
| 5Co/Al <sub>2</sub> O <sub>3</sub>  | 15.8           | 97.0                          | 0.2                           | 1.5                           | 1.3             |
| 10Co/Al <sub>2</sub> O <sub>3</sub> | 11.6           | 94                            | 0.4                           | 2.2                           | 3.4             |

<sup>a</sup> Reaction condition: temperature, 590°C; catalyst weight, 0.1 g; gas feed, 16.2 kPa C<sub>3</sub>H<sub>8</sub> and N<sub>2</sub> balance; flow rate, 25 mL min<sup>-1</sup>; reaction time, 2h.

**Table S2.** The catalytic properties of series of cobalt-based catalysts in propane dehydrogenation.<sup>a</sup>

| Catalysts                                    | Conversion (%) | Selectivity (%)               |                               |                               |                 |
|----------------------------------------------|----------------|-------------------------------|-------------------------------|-------------------------------|-----------------|
|                                              |                | C <sub>3</sub> H <sub>6</sub> | C <sub>2</sub> H <sub>6</sub> | C <sub>2</sub> H <sub>4</sub> | CH <sub>4</sub> |
| 5Co/Al <sub>2</sub> O <sub>3</sub>           | 15.8           | 97.0                          | 0.2                           | 1.5                           | 1.3             |
| 5Co1.6Fe/Al <sub>2</sub> O <sub>3</sub>      | 22.4           | 97.3                          | 0.2                           | 1.2                           | 1.3             |
| 5Co1.6Cu/Al <sub>2</sub> O <sub>3</sub>      | 10.4           | 95.4                          | 0.1                           | 2.8                           | 1.7             |
| 5Co1.6Mn/Al <sub>2</sub> O <sub>3</sub>      | 13.4           | 96.9                          | 0.1                           | 1.6                           | 1.4             |
| 5Co/Al <sub>2</sub> O <sub>3</sub> -com      | 16.2           | 96.9                          | 0.1                           | 1.7                           | 1.3             |
| 5Co1.6Fe/Al <sub>2</sub> O <sub>3</sub> -com | 16.5           | 96.2                          | 0.4                           | 1.7                           | 1.7             |

<sup>a</sup> Reaction condition: temperature, 590°C; catalyst weight, 0.1 g; gas feed, 16.2 kPa C<sub>3</sub>H<sub>8</sub>, and N<sub>2</sub> balance; flow rate, 25 mL min<sup>-1</sup>; reaction time, 2h.

**Table S3.** The summary of catalytic performances in propane dehydrogenation over some typical catalysts reported in literatures.

| Catalysts                                                             | Temp<br>(°C) | Gas feed<br>(in volume ratio)                                                 | GHSV<br>(mL·g <sub>cat</sub> <sup>-1</sup> ·h <sup>-1</sup> ) | WHSV<br>(g·g <sub>cat</sub> <sup>-1</sup> ·h <sup>-1</sup> ) | Time<br>(h) | Conversion<br>(%) | Selectivity<br>(%) | Specific activity <sup>a</sup><br>(×10 <sup>-3</sup> mol <sub>C<sub>3</sub>H<sub>6</sub></sub> ·mol <sup>-1</sup> ·s <sup>-1</sup> ) | Ref.      |
|-----------------------------------------------------------------------|--------------|-------------------------------------------------------------------------------|---------------------------------------------------------------|--------------------------------------------------------------|-------------|-------------------|--------------------|--------------------------------------------------------------------------------------------------------------------------------------|-----------|
| 5 wt%Co1.6 wt%Fe/Al <sub>2</sub> O <sub>3</sub>                       | 590          | C <sub>3</sub> H <sub>8</sub> /N <sub>2</sub> =4/21                           | 2400                                                          | 4.7                                                          | 2           | 22.4              | 97.3               | 7.7                                                                                                                                  | This work |
| 5.7wt%Co/Al <sub>2</sub> O <sub>3</sub> -re-oxidizd                   | 600          | C <sub>3</sub> H <sub>8</sub> /N <sub>2</sub> =15.4/30.8                      | 465                                                           | 0.9                                                          | 2           | 26.0              | 93.0               | 2.5                                                                                                                                  | [1]       |
| 20wt%Co5wt%S/Al <sub>2</sub> O <sub>3</sub>                           | 560          | C <sub>3</sub> H <sub>8</sub> =12                                             | 360                                                           | 0.7                                                          | 6           | 21.0              | 76.0               | 0.2                                                                                                                                  | [2]       |
| 11.1wt%CoAl <sub>2</sub> O <sub>3</sub>                               | 600          | C <sub>3</sub> H <sub>8</sub> /N <sub>2</sub> =1/19                           | 300                                                           | 0.6                                                          | 5           | 15.0              | 80.0               | 0.6                                                                                                                                  | [3]       |
| 5wt%Co/Al <sub>2</sub> O <sub>3</sub>                                 | 560          | C <sub>3</sub> H <sub>8</sub> =12                                             | 240                                                           | 0.5                                                          | 6           | 28.0              | 90.0               | 0.9                                                                                                                                  | [4]       |
| 5wt%Co/Al <sub>2</sub> O <sub>3</sub> -NS                             | 600          | C <sub>3</sub> H <sub>8</sub> /He=2.7/27.3                                    | 550                                                           | 1.1                                                          | 5           | 17.6              | 81.0               | 2.0                                                                                                                                  | [5]       |
| 7wt%Co-Al <sub>2</sub> O <sub>3</sub> -HT                             | 590          | C <sub>3</sub> H <sub>8</sub> /H <sub>2</sub> /N <sub>2</sub> =<br>4/3.6/12.8 | 1600                                                          | 2.9                                                          | 5           | 21.1              | 97.1               | 3.7                                                                                                                                  | [6]       |
| 20wt%Fe-P/Al <sub>2</sub> O <sub>3</sub>                              | 600          | C <sub>3</sub> H <sub>8</sub> /N <sub>2</sub> = 1/20                          | 150                                                           | 0.29                                                         | 5.5         | 15.0              | 80                 | 0.06                                                                                                                                 | [7]       |
| 5wt%Fe <sup>II</sup> /SiO <sub>2</sub>                                | 650          | C <sub>3</sub> H <sub>8</sub> /Ar= 3/97                                       | 100                                                           | 0.2                                                          | 18          | 6.3               | 99                 | 0.1                                                                                                                                  | [8]       |
| 12wt%VO <sub>x</sub> /Al <sub>2</sub> O <sub>3</sub>                  | 600          | C <sub>3</sub> H <sub>8</sub> /H <sub>2</sub> = 1/1                           | 1530                                                          | 3.0                                                          | --          | 33.0              | 94.0               | 2.5                                                                                                                                  | [9]       |
| 1wt%Sn-Cr <sub>2</sub> O <sub>3</sub> /Al <sub>2</sub> O <sub>3</sub> | 610          | C <sub>3</sub> H <sub>8</sub> /N <sub>2</sub> = 1/4                           | 260                                                           | 0.5                                                          | --          | 50.0              | 90.0               | 7.3                                                                                                                                  | [10]      |
| 7wt%Cr <sub>2</sub> O <sub>3</sub> /Al <sub>2</sub> O <sub>3</sub>    | 580          | C <sub>3</sub> H <sub>8</sub> /H <sub>2</sub> /N <sub>2</sub> = 7/7/11        | 2800                                                          | 5.5                                                          | 1           | 15.5              | 98.0               | 4.0                                                                                                                                  | [11]      |

<sup>a</sup> Specific activity is defined as the moles of C<sub>3</sub>H<sub>6</sub> formation per mole of metal atom per second.



## References

- [1] X. Li, P. Wang, H. Wang and C. Li, *Appl. Surf. Sci.*, 2018, **441**, 688–693.
- [2] Y. Sun, Y. Gao, Y. Wu, H. Shan, G. Wang and C. Li, *Catal. Commun.*, 2015, **60**, 42–45.
- [3] T. Mesoporous, C. S. Catalyst, N. Propane, A. B. Hu, W. Kim, T. P. Sulmonetti, L. Michele, S. Tan, J. So, Y. Liu, R. Dixit, S. Nair, C. W. Jones, B. Hu, W. Kim, T. P. Sulmonetti, M. L. Sarazen, S. Tan and J. So, *ChemCatChem.*, 2017, **17**, 3330-3337. doi:10.1002/cctc.201700647.
- [4] Y. Sun, Y. Wu, H. Shan and C. Li, *Catal. Letters*, 2015, **145**, 1413–1419.
- [5] N. Dewangan, J. Ashok, M. Sethia, S. Das, S. Pati, H. Kus and S. Kawi, *ChemCatChem.*, 2019, **11**, 4923–4934.
- [6] Y. Dai, J. Gu, S. Tian, Y. Wu, J. Chen, F. Li, Y. Du, L. Peng, W. Ding and Y. Yang, *J. Catal.*, 2020, **381**, 482–492.
- [7] S. Tan, B. Hu, W-G. Kim, S. H. Pang, J. S. Moore, Y. Liu, R.a S. Dixit, J. G. Pendergast, D. S. Sholl, S. Nair and C. W. Jones, *ACS Catal.* 2016, **6**, 5673–5683.
- [8] B. Hu, N. M. Schweitzer, G. Zhang, S. J. Kraft, D. J. Childers, M. P. Lanci, J. T. Miller, and A. S. Hock, *ACS Catal.* 2015, **5**, 3494–3503.
- [9] G. Liu, Z.-J. Zhao, T. Wu, L. Zeng and J. Gong, *ACS Catal.* 2016, **6**, 5207-5214.
- [10] F. Cabrera, D. Ardisson and O. F. Gorrioz, *Catal. Today.*, 2008, **133**, 800-804.
- [11] D. Shee and A. Sayari, *Appl. Catal. A-Gen.*, 2010, **389**, 155-164.
